# **Endoparasites and vector-borne pathogens in dogs from Greek islands: pathogen distribution and zoonotic implications**

**Anastasia Diakou<sup>1</sup>, Angela Di Cesare<sup>2</sup>, Simone Morelli<sup>2</sup>, Mariasole Colombo<sup>2</sup>, Lenaig Halos<sup>3</sup>, Giulia Simonato<sup>4</sup>, Androniki Tamvakis<sup>5</sup>, Frederic Beugnet<sup>3</sup>, Barbara Paoletti<sup>2</sup>, Donato Traversa<sup>2\*</sup>**

<sup>1</sup> Laboratory of Parasitology and Parasitic Diseases, School of Veterinary Medicine, Faculty of Health Sciences, Aristotle University of Thessaloniki, 54124, Thessaloniki, Greece

<sup>2</sup> Faculty of Veterinary Medicine, University of Teramo, Località Piano D'Accio snc., 64100, Teramo, Italy

<sup>3</sup> Boehringer-Ingelheim Animal Health, 29 Avenue Tony Garnier, 69007, Lyon, France

<sup>4</sup> Department of Animal Medicine, Production and Health, University of Padua, Viale dell'Università 16, Legnaro, Padua, Italy

<sup>5</sup> Laboratory of Ecology and System Dynamics, Department of Marine Sciences, University of the Aegean, 81100 Mytilene, Lesvos, Greece

**\*Corresponding Author (DT)**

Email [dtraversa@unite.it](mailto:dtraversa@unite.it) (DT)

27

## 28 **Abstract**

29 The present study investigated the presence of endo- and ecto-parasites, and vector-borne pathogens,  
30 in dogs from four islands of Greece. A total of 200 owned and sheltered dogs were examined with  
31 different microscopic, serological and molecular methods.

32 Of the examined dogs, 130 (65%) were positive for one or more parasites and/or vector-borne  
33 pathogens. The most common zoonotic intestinal helminths recorded were Ancylostomatidae  
34 (12.5%) and *Toxocara canis* (3.5%). Ninety-three dogs (46.5%) seroreacted to *Rickettsia conorii*.  
35 Twenty-two (11%) of them were also PCR positive and 7 (3.5%) showed corpuscles suggestive of  
36 *Rickettsia* spp. on the blood smears. Nineteen dogs (9.5%) were seropositive for *Ehrlichia canis*, three  
37 of them being also PCR positive. Dogs positive for *Anaplasma phagocytophilum*-*Anaplasma platys*  
38 (1%), *Dirofilaria immitis* (0.5%) and *Babesia canis* (0.5%) were also found. Fleas and ticks were  
39 recorded in 53 (26.5%) and 50 (25%) dogs and all specimens were identified as *Ctenocephalides felis*  
40 *felis* and *Rhipicephalus sanguineus sensu latu*. Binary multiple univariate Generalized Linear Models  
41 were used to investigate factors and clinical signs related to the recorded positivity, while the  
42 association of specific signs with the pathogens was evaluated using tests of independence.  
43 Knowledge of occurrence and impact of zoonotic parasites and vector-borne pathogens in dog  
44 populations is crucial to prevent the infection in animals and people, and to control the risk of  
45 spreading of these pathogens in endemic and non-endemic areas.

46

## 47 **Author summary**

48 Both owned and sheltered dogs can harbor a variety of intestinal and extra-intestinal endoparasites,  
49 as well as vector-borne pathogens and ectoparasites, of zoonotic concern. Dog shelters and stray dogs  
50 are present in several touristic areas of Greece, including Sporades and Cyclades islands, where  
51 tourists often bring their pets with them, likely travelling from non-endemic to endemic areas. The

present study has been carried out with the aim to evaluate the occurrence of the aforementioned pathogens. Data obtained showed that they are present in canine populations of Greece, with possibilities of infection for travelling dogs, which can also contribute to the spreading of zoonotic vector-borne diseases, introducing new pathogens in previously non-endemic areas. For these reasons, a constant monitoring of the epidemiological situation, improving control measures and correct diagnostic approaches are of primary importance for the prevention of canine and human infections, decreasing the spreading of potentially deadly pathogens.

**Keywords: Dog; Greece, Helminths; Vector-borne diseases; Zoonoses**

## **Introduction**

Several parasitoses (e.g. internal helminthoses) and vector-borne diseases (VBDs) of veterinary importance represent a serious hazard for human health, particularly when transmission pressure and circulation of zoonotic infections are difficult to control. Because of a lifestyle that implies a low-grade of sanitary management, stray and free-roaming dogs are at high risk of becoming infected with a wide range of pathogens. Consequently, they act as a permanent source of infection for vectors, other animals and humans [1, 2].

Although dogs are efficient sentinels for investigating the occurrence and the epidemiological impact of zoonoses [2, 3] and a constant sanitary monitoring of canine populations is crucial, data on the simultaneous occurrence of endo/ecto- parasites and VBDs in several Mediterranean areas are still limited to specific narrow areas or to selected pathogens [4-7].

The number of stray dogs in most Greek Islands is low but many privately owned animals have a free-ranging lifestyle due to the local rural territory. Moreover, some islands have shelters for stray and abandoned animals, where prevention and treatment regimens are not regularly applied. At the same time, the number of dogs travelling to and from the insular Greece is increasing in proportion

to tourism [8] with the realistic risk that these pets may acquire or introduce pathogens. Interestingly, a recent study conducted in Greece has shown that cats may be infected and/or exposed to a number of intestinal parasites and agents transmitted by arthropods, several of them of zoonotic importance and potentially shared between cats and dogs [9]. Therefore, the present study aimed to investigate the simultaneous occurrence of intestinal parasites, vector-borne pathogens and ectoparasites, in different canine populations, including stray and owned dogs in four regions of insular Greece.

## Methods

### Study areas and sampling

The study was conducted in four islands of Greece. Authorizations to sample and examine the dogs were obtained case-by-case from local authorities, animal responsables/owners and animal rights organisations. Available data on sex, breed, living conditions, age and presence or absence of clinical signs compatible with parasitoses were registered for each animal. Both faecal and blood samples were collected from dogs, that were also examined for fleas, ticks, ear mites and, in the presence of compatible skin lesions, body manges.

Ethics approval is not applicable as all activities carried out on dogs in the present study have been performed by routine diagnostics procedures performed by veterinarians working on each study site. Consent to examine and sample the animals have been obtained, case by case, from local authorities, animal owners and animal right organisations. Therefore, no official ethics permission or further authorization was required.

### Copromicroscopic examinations

Faecal samples were examined using standard zinc sulphate flotation and merthiolate iodine formaldehyde (MIF) - ether sedimentation methods [10, 11].

102  
103  
104  
105  
106  
107  
108  
109  
110  
111  
112  
113  
114  
115  
116  
117  
118  
119  
120  
121  
122  
123  
124

# **Blood analysis**

**Microscopic examinations.** Giemsa stained blood smears were performed to evaluate by light microscopy at 1000× magnification the presence of *Babesia* spp., *Rickettsia* spp., *Ehrlichia* spp. and *Anaplasma* spp. elements, based on morphology, size and cellular tropism [12, 13].

A modified Knott’s technique was performed to detect and identify circulating microfilariae under light microscope (100×, 200× and 400× magnifications) [12]. If present, microfilariae were identified on the basis of differential morphometric (i.e. length and width) and morphological (i.e. anterior and posterior end) characteristics [14, 15].

**Serological examinations.** Sera obtained from blood samples were subjected to the following serological examinations, according to the manufacturers’ instructions.

-SNAP 4Dx Plus test (IDEXX Laboratories, Inc. USA) for the detection of *Dirofilaria immitis* circulating antigens and of antibodies against *Anaplasma phagocytophilum*/*Anaplasma platys*, *Ehrlichia canis* and *Borrelia burgdorferi*;

-*Leishmania* IC test (Agrolabo diagnostics, Italy) for the qualitative detection of anti-*L. infantum* antibodies;

-indirect immunofluorescence antibody assay kits (IFAT) “Mega FLUO® BABESIA *canis*” (Megacor Diagnostik GmbH, Austria) and “Mega FLUO® RICKETTSIA *conorii*” (Megacor Diagnostik GmbH, Austria) for the detection of anti-*Babesia canis*-IgG and anti-*Rickettsia conorii*-IgG, with a screening dilution of 1:128 and 1:64 for *B. canis* and *R. conorii* respectively.

Positive and negative control sera were included in each test series.

**Molecular detection.** Genomic DNA was extracted from blood samples using a commercial kit (QIAamp DNA blood Mini kit - Qiagen GmbH, Hilden, Germany), and PCR positivity to

Anaplasmatacea, *Rickettsia* spp., *Babesia* spp. and *Leishmania* spp. DNA was tested by different protocols (Table 1) [16, 17].

PCR products were individually sequenced directly in an automated sequencer. Sequences were determined in both directions, aligned using ClustalX software and analyzed with sequences available in GenBank™ using Nucleotide Basic Local Alignment Search Tool (BLASTN) [18].

**Table 1.**

| Pathogen                                     | Gene               | Primers (5'-3')                                                                                                                                       | Product size (bp) | Reference |
|----------------------------------------------|--------------------|-------------------------------------------------------------------------------------------------------------------------------------------------------|-------------------|-----------|
| <i>Anaplasma</i> spp./ <i>Ehrlichia</i> spp. | 16S rRNA           | EHR16SD: GGTACCYACAGAAGAAGTCC<br>EHR16SR: TAGCACTCATCGTTTACAGC                                                                                        | 345               | [16]      |
| <i>Babesia</i> spp.                          | 18S rRNA           | PIRO-A: AATACCCAATCCTGACACAGGG<br>PIRO-B: TTAAATACGAATGCCCCAAC                                                                                        | 400               | [16]      |
| <i>Rickettsia</i> spp.                       | Citrate synthase   | Rsfg877: GGGGGCCTGCTCACGGCGG<br>Rsfg1258: ATTGCAAAAAGTACAGTGAACA                                                                                      | 381               | [17]      |
| <i>Leishmania</i> spp.                       | Small subunit rRNA | Outer primers:<br>R221: GGTTTCCTTTCCTGATTACG<br>R332: GGCCGGTAAAGGCCGAATAG<br>Inner primers:<br>R223: TCCCATCGCAACCTCGGTT<br>R333: AAAGCGGGCGCGGTGCTG | 603<br><br>358    | [16]      |

Target genes amplified for the PCR analyses and primers used.

## Ectoparasites

**Fleas and ticks.** The entire body of each dog was examined with an extra-fine flea comb. Fleas seen on the comb were removed using forceps and placed in a 2 ml microtube containing 70% ethanol for storage. If fleas were not present, any debris found on the comb was transferred to a piece of moist white paper, and animals were considered infected if the debris dissolved into a red color.

Ticks were individuated by thumb-counting, removed using forceps and placed in a 2 ml microtube containing 70% ethanol pending identification.

Collected fleas and ticks were identified by standard morphologic and morphometric keys [11, 19, 20].

**Mites.** All dogs were subjected to an otoscopic examination by ear swabs to detect the presence of any sign (e.g. errhytema, black/brown waxy discharge) caused by the ear mite *Otodectes cynotis*. Each ear swab was smeared with the addition of small quantity of mineral oil onto a glass slide, and examined under a microscope to identify mites by standard morphological keys [11, 21]. In the presence of compatible clinical signs, e.g. skin areas with loss of hair, itching, reddened rash, yellowish crusts, dogs were examined for manges as deemed appropriate. The collected material was examined under a microscope to identify mites by standard morphological keys [11, 21].

## Statistical analysis

Statistical analysis was performed to evaluate the association of five main factors (study site, age, sex, lifestyle and travel history) with infections and parasitoses detected in the examined dogs, especially with zoonotic potential. Binary multiple univariate Generalized Linear Models (GLM) were used to test the above mentioned factors with the presence of endoparasites (intestinal helminths and filariae), exposure/positivity for VBDs, positivity to zoonotic pathogens (*R. conorii*, *Anaplasma* spp., *L. infantum*, *Dirofilaria* spp., Ancylostomatidae and *T. canis*) and presence of ectoparasites [22]. Furthermore, the determined odds ratio (OR) was used to measure the strength of association between the values of each factor to the presence of each infection. The same analysis was applied to test whether the occurrence of four major clinical signs (i.e. dermatological signs, ocular manifestations, weight loss and pale mucosae) was related to the detection of a VBD.

Finally, the association of gastrointestinal signs with intestinal parasitism and ectoparasitoses as evidence of exposure to VBDs was statistically tested using Fisher's exact test of independence [23]. The statistical analysis was implemented using the R package version 3.2.2 (R Development Core Team, 2006).

## Results

171

## 172 Enrolment and geographical distribution

173 Overall 200 dogs, i.e. 66, 50, 43 and 41 dogs from four islands, Santorini, Tinos, Ios and Skiathos,  
174 were included in the survey, respectively.

175 Table 2 reports age, sex and lifestyle of study dogs. In particular, 87 were privately owned with no  
176 travel history, 36 were pets that had travelled with their owners at least once (i.e. 32 across Greece, 2  
177 in Bulgaria, 1 in Italy and 1 in different European countries), and 77 where sheltered animals. Both  
178 owned and sheltered dogs were highly distributed within different islands and age groups, with the  
179 exception of stray animals less than 1-year-old that were found only in Santorini (n=13).  
180 Nevertheless, the dataset was considered as sufficiently large (n=200) so that the heuristic rule (i.e. a few  
181 of the expected cells counts less than five is not violated) provides safe statistical results [24].

182

183 **Table 2.**

| Island    | stray dogs   |     |    |       |       | Owned dogs   |     |     |       |       |
|-----------|--------------|-----|----|-------|-------|--------------|-----|-----|-------|-------|
|           | age in years |     |    |       | ♂/♀   | age in years |     |     |       | ♂/♀   |
|           | <1           | 1-7 | >7 | total |       | <1           | 1-7 | >7  | total |       |
| Santorini | 13           | 19  | 2  | 34    | 19/15 | 6*           | 18* | 8*  | 32    | 18/14 |
| Skiathos  | 0            | 25  | 2  | 27    | 14/13 | 1            | 10* | 3   | 14    | 8/6   |
| Ios       | 0            | 2   | 0  | 2     | 0/2   | 5*           | 27* | 9*  | 41    | 21/20 |
| Tinos     | 0            | 7   | 7  | 14    | 8/6   | 3            | 24* | 9*  | 36    | 17/19 |
| Total     | 13           | 53  | 11 | 77    | 41/36 | 15*          | 79* | 29* | 123   | 64/59 |

184 \*group that includes dogs that have travelled in the country or abroad

185 Distribution of the dogs examined in the different islands, per lifestyle, age group and sex.

186

## 187 Exposure to parasites, vector borne diseases and prevalence of zoonotic agents.

188 Overall 130 dogs (65%) were positive for at least one intestinal parasite or VBD. In particular, 96  
189 (48%) showed a monospecific infection and 34 (17%) scored positive for mixed infections by  
190 endoparasites and VBD. Two animals (1%) were infected by more than 1 endoparasite, 16 (8%) by  
191 more than one VBD and 16 (8%) were infected by both intestinal parasites and VBDs. Various



zoonotic agents were found in 128 (64%) dogs. Fleas and ticks were recorded in 53 (26.5%) and 50 (25%) dogs respectively.

194

**Endoparasites.** Overall thirty-six (18%) dogs were positive for at least one endoparasite at copromicroscopic examinations. Ancylostomatidae (12.5%, 25/200) and *Toxocara canis* (i.e. 3.5%, 7/200) were the most common zoonotic helminths. Non-zoonotic infections by *Trichuris vulpis* (3.5%) and coccidia (1%) were also found (Table 3). Eggs of the zoonotic rat tapeworm *Hymenolepis diminuta* were detected in the faeces of one dog, while eggs of the trematode *Dicrocoelium dendriticum* were found in the faeces of another animal.

The relative prevalence of intestinal parasites was related to the island of residence, the age and the lifestyle of the animal (Table 4). In particular, the odd of intestinal parasites occurrence was 5.49, 11.43 and 23.86 times higher in animals residing in Santorini, compared to those that reside in Tinos, Ios and Skiathos, respectively. Animals ageing 1 to 7 years were found to be 4 times (i.e. 1/0.25) more likely to be infected compared to young animals up to 1 year of age. Furthermore, a higher risk of intestinal parasites prevalence was found in stray dogs (odds ratio=11.37) compared to owned dogs. Nonetheless, the overall occurrence of intestinal parasites was not related to the presence of clinical signs (Fisher's exact test,  $p=0.3283$ ).

209

**Table 3.**

| Pathogen                        | n. positive (%) |
|---------------------------------|-----------------|
| Nematodes                       |                 |
| Ancylostomatidae                | 25 (12.5)       |
| <i>Toxocara canis</i>           | 7 (3.5)         |
| <i>Trichuris vulpis</i>         | 7 (3.5)         |
| Protozoan                       |                 |
| <i>Cystoisospora</i> spp.       | 2 (1)           |
| Platyhelminthes                 |                 |
| <i>Hymenolepis diminuta</i>     | 1 (0.5)         |
| <i>Dicrocoelium dendriticum</i> | 1 (0.5)         |

**Total number of positive dogs 36 (18)**

Prevalence of intestinal parasites (as determined by standard copromicroscopic examination) in the study dog population.

**Table 4.**

| Variable                         | Positive for<br>intestinal parasites<br>Odds ratio<br>(95% CI)<br><i>GLM P-value</i> | Positive for<br>VBDs<br>Odds ratio<br>(95% CI)<br><i>GLM P-value</i> | Positive for<br>filariae<br>Odds ratio<br>(95% CI)<br><i>GLM P-value</i> | Positive for<br>ectoparasites<br>Odds ratio<br>(95% CI)<br><i>GLM P-value</i> | Zoonotic<br>infections<br>Odds ratio<br>(95% CI)<br><i>GLM P-value</i> |
|----------------------------------|--------------------------------------------------------------------------------------|----------------------------------------------------------------------|--------------------------------------------------------------------------|-------------------------------------------------------------------------------|------------------------------------------------------------------------|
| <i>Island</i>                    |                                                                                      |                                                                      |                                                                          |                                                                               |                                                                        |
| Santorini vs Tinos               | 5.49<br>(1.60-18.83)<br><b>0.007**</b>                                               | 0.30<br>(0.13-0.67)<br><b>0.005**</b>                                | Na                                                                       | 0.58<br>(0.24-1.37)<br>0.211                                                  | 0.66<br>(0.28-1.59)<br>0.357                                           |
| Santorini vs Ios                 | 11.43<br>(1.31-99.56)<br><b>0.027*</b>                                               | 0.76<br>(0.31-1.85)<br>0.548                                         | Na                                                                       | 4.51<br>(1.52-13.36)<br><b>0.007**</b>                                        | 1.73<br>(0.70-4.30)<br>0.233                                           |
| Santorini vs Skiathos            | 23.86<br>(5.51-103.33)<br><b>&lt;0.001***</b>                                        | 0.24<br>(0.10-0.60)<br><b>0.002**</b>                                | Na                                                                       | 19.28<br>(5.51-67.41)<br><b>&lt;0.001***</b>                                  | 0.77<br>(0.29-2.07)<br>0.613                                           |
| <i>Age</i>                       |                                                                                      |                                                                      |                                                                          |                                                                               |                                                                        |
| Up to 1 yr vs 1 to 7<br>yrs      | 0.25<br>(0.06-0.97)<br><b>0.046*</b>                                                 | 0.36<br>(0.14-0.96)<br><b>0.040*</b>                                 | Na                                                                       | 0.67<br>(0.24-1.89)<br>0.458                                                  | 0.26<br>(0.10-0.69)<br><b>0.007**</b>                                  |
| Up to 1 yr vs more<br>than 7 yrs | 0.26<br>(0.05-1.35) 0.108                                                            | 0.54<br>(0.18-1.64)<br>0.277                                         | Na                                                                       | 0.59<br>(0.17-1.97)<br>0.392                                                  | 0.51<br>(0.17-1.54)<br>0.229                                           |
| <i>Sex</i>                       |                                                                                      |                                                                      |                                                                          |                                                                               |                                                                        |
| Male vs Female                   | 1.36<br>(0.54-3.45)<br>0.518                                                         | 2.33<br>(0.24-4.37)<br><b>0.008**</b>                                | 0.61<br>(0.07-5.45)<br>0.656                                             | 0.72<br>(0.36-1.45)<br>0.356                                                  | 2.13<br>(1.11-4.10)<br><b>0.023*</b>                                   |
| <i>Lifestyle</i>                 |                                                                                      |                                                                      |                                                                          |                                                                               |                                                                        |
| Stray vs Owned                   | 11.37<br>(3.73-34.72)<br><b>&lt;0.001***</b>                                         | 1.15<br>(0.55-2.40)<br>0.707                                         | 0.29<br>(0.03-2.98)<br>0.300                                             | 3.17<br>(1.37-7.34)<br><b>0.007**</b>                                         | 3.00<br>(1.37-6.60)<br><b>0.006**</b>                                  |
| <i>Travel</i>                    |                                                                                      |                                                                      |                                                                          |                                                                               |                                                                        |
| Yes vs No                        | 0.49<br>(0.05-4.48)<br>0.526                                                         | 1.34<br>(0.58-3.11)<br>0.498                                         | Na                                                                       | 0.33<br>(0.11-0.97)<br><b>0.043*</b>                                          | 1.10<br>(0.48-2.53)<br>0.819                                           |

Statistical analysis evaluating various factors (i.e. island where the dogs lived, age, sex, lifestyle and traveling history) in relation to the different infections detected in the study animals. \*Statistical significant result at the 0.05 level; \*\*Statistical significant result at the 0.01 level; \*\*\* Statistical significant result at the 0.001 level.

222 **Ectoparasites.** Fleas were recorded in 26.5% of the dogs (53/200), specifically in 24.2% (16/66),  
 223 58% (29/50), 9.3% (4/43) and 9.8% (4/41) dogs from Santorini, Tinos, Ios and Skiathos respectively.  
 224 All collected specimens were identified as *Ctenocephalides felis felis*. Ticks were present in 25% of  
 225 the dogs (50/200), namely in 40.9% (27/66), 38% (19/50) and 9.3% (4/43) from Santorini, Tinos and  
 226 Ios respectively. All ticks were *Rhipicephalus sanguineus sensu latu*. Mites were not found in any of  
 227 the investigated dogs.

228 Mixed infections by ticks and transmitted diseases were recorded in 28 (14%) dogs while no dogs  
 229 showed mixed infection by fleas and transmitted pathogens.

230 The occurrence of fleas and ticks was statistically associated with study site, lifestyle and travelling.  
 231 Specifically, a higher risk of ectoparasitosis was recorded in Santorini against Ios (odds ratio=4.51)  
 232 and Skiathos (odds ratio=19.28), while the same risk was found in Tinos. Stray dogs increased the  
 233 odds of ectoparasitosis (odds ratio=3.17), while travelling decreased the odds (odds ratio=0.33)  
 234 (Table 4).

235

236 **Blood examination (Table 5).**

237 *Rickettsia conorii*: Overall, 93 dogs (46.5%) seroreacted to *R. conorii*. Twenty-two (11%) were also  
 238 PCR positive and, at the blood smear examination, the samples of seven (3.5%) of them was positive  
 239 for corpuscles suggestive *Rickettsia* spp. in the monocytes. Sequences from the 22 PCR products  
 240 showed 99% identity with *R. conorii* GenBank Accession number U59730.1. All dogs negative by  
 241 serological analyses were also negative for *Rickettsia* spp. upon PCRs. Of the 93 *R. conorii*-  
 242 seropositive dogs, 19 had a tick infection and 6 scored also PCR- positive for *R. conorii*. The  
 243 prevalence of *R. conorii* in animals was found statistically related with the presence of  
 244 lymphadenopathy (Fisher's exact test,  $p=0.0177$ ) whilst no any relation was detected with signs like  
 245 weight loss, pale mucous membrane, gastrointestinal disorders, conjunctivitis or dermatological  
 246 manifestations (Fisher's exact test,  $p\geq 0.05$ ).

247 Anaplasmataceae: Nineteen dogs (9.5%) were seropositive for *E. canis*, three of them being also  
 248 positive at the PCR (100% homology with Genbank Accession number LC018188.1), while the  
 249 others were PCR-negative. Two dogs (1%) seroreacted for *A. phagocytophilum/A. platys*. One of  
 250 them showed corpuscles suggestive of *Anaplasma* spp. in the monocytes at the Giemsa staining and  
 251 scored PCR-positive for *A. phagocytophilum* (homology of 100% with Genbank Accession number  
 252 KY114936.1), while the other was microscopically and PCR-negative.

253 Ticks were present in 15/19 dogs seropositive for *E. canis* at the SNAP 4Dx Plus and 3 of them were  
 254 among those that scored positive at the PCR.

255 *Babesia* spp.: One dog (0.5%) was serologically and PCR positive for *B. canis* showing homology of  
 256 99% with GenBank Accession number: KJ696714.1, while all other dogs were negative.

257 *Leishmania infantum*: A total of 13 (6.5%) samples seroreacted for *L. infantum* and all of them were  
 258 also PCR-sequencing positive, with 99-100% identity with *L. infantum* GenBank Accession number  
 259 HM807524.1. All seronegative dogs were also negative upon PCR.

260 *Dirofilaria* spp.: One (0.5%) of the examined dogs was positive for *D. immitis*, at both Knott's test  
 261 and serology. Moreover, in three dogs (1.5%) microfilariae of *Dirofilaria repens* were found in the  
 262 Knott's test.

263

264 **Table 5.**

| Pathogen                   | PCR             | Serological<br>detection | Smear or other direct<br>parasitological examination |                                                |
|----------------------------|-----------------|--------------------------|------------------------------------------------------|------------------------------------------------|
|                            | n. positive (%) | n. positive (%)          | n. positive (%)                                      | n. positive (%) by at<br>least one of the test |
| Anaplasmataceae            |                 |                          |                                                      |                                                |
| <i>Ehrlichia canis</i>     | 3 (1.5)         | 19 (9.5)                 | 0                                                    | 19 (9.5)                                       |
| <i>Anaplasma</i> spp.      | 1 (0.5)         | 2 (1)                    | 1                                                    | 2 (1)                                          |
|                            | <i>A. ph.</i>   | <i>A. ph/A.pl</i>        | <i>Anaplasma</i> spp.                                | <i>A. ph/A.pl</i>                              |
| <i>Leishmania infantum</i> | 13 (6.5)        | 13 (6.5)                 | 0                                                    | 13 (6.5)                                       |
|                            | <i>L. i.</i>    | <i>L. i.</i>             |                                                      | <i>L. i.</i>                                   |
| <i>Rickettsia conorii</i>  | 22 (11)         | 93 (46.5)                | 7                                                    | 93 (46.5)                                      |
|                            | <i>R. c.</i>    | <i>R. c.</i>             | <i>Rickettsia</i> spp.                               | <i>R. c.</i>                                   |
| <i>Babesia canis</i>       | 1 (0.5)         | 1 (0.5)                  | 0                                                    | 1 (0.5)                                        |
|                            | <i>B. c.</i>    | <i>B. c.</i>             |                                                      | <i>B. c.</i>                                   |
| <i>Dirofilaria</i> spp.    | ND              | 1 (0.5)                  | 1 (0.5)                                              | 1 (0.5)                                        |

|                             |    | <i>D. i.</i><br>ND | <i>D. i.</i><br>3 (1.5) | <i>D. i.</i><br>3 (1.5) |
|-----------------------------|----|--------------------|-------------------------|-------------------------|
|                             |    |                    | <i>D. r.</i>            | <i>D. r.</i>            |
| <i>Borrelia burgdorferi</i> | ND | 0/200 (0)          | ND                      | 0/200 (0)               |

Observed prevalence of vectorn borne pathogens (as determined by PCR, serology and blood microscopy) in the study dog population. *A. ph.*: *Anaplasma phagocytophilum*; *A. pl.*: *Anaplasma platys*; *L. i.*: *Leishmania infantum*; *R. c.*: *Rickettsia conorii*; *B. c.*: *Babesia canis*; *D. i.*: *Dirofilaria immitis*; *D. r.*: *Dirofilaria repens*.

**Risk factor for exposure to parasites and VBDs.** The percentage of dogs positive for at least one intestinal parasites and/or VBDs was similar between travelling (i.e. 58.3%) and non-travelling dogs (66.5%) while the highest number of infected animals was found in sheltered animals (83.1%).

The exposure to at least one VBD was statistically associated to the study site, the sex and the age. In particular, animals residing in Skiathos were 4.17 (i.e. 1/0.24) and 3.17 (i.e. 0.76/0.24) times more likely to be infected than those in Santorini and Ios, respectively, while no difference was found compared to dogs from Tinos. Furthermore, VBD prevalence was associated with sex and age, as males increased the odds (odds ratio=2.33) and dogs ageing up to 1 year decreased the odds (odds ratio=0.36) against those ageing 1-7 years.

The diagnosis of VBDs was associated with the presence of various skin lesions (GLM,  $p < 0.05$ ) in infected animals. In fact, animals with skin lesion were 3.2 times more likely to be seropositive compared to those with no dermatological manifestations. Similarly, weight loss was associated with 5.43-fold increased odds (Table 6). Nonetheless, positivity to a VBD was not related to the presence of ectoparasites (Fisher's exact test,  $p = 0.6623$ ), as clinical signs (i.e. lymphadenopathy, pale mucous membrane or conjunctivitis) were not statistically significant factors (GLM,  $p > 0.05$ ).

**Table 6.**

|  | Positive for VBD | Positive for <i>L. infantum</i> |
|--|------------------|---------------------------------|
|--|------------------|---------------------------------|

| Variable                                    | Odds ratio<br>(95% CI) | GLM<br>P-Value | Odds ratio<br>(95% CI) | GLM<br>P-Value |
|---------------------------------------------|------------------------|----------------|------------------------|----------------|
| <i>Lymphadenopathy</i>                      | 0.66                   | 0.335          | 0.82                   | 0.815          |
| Yes vs No                                   | (0.28-1.54)            |                | (0.16-4.30)            |                |
| <i>Dermatological manifestations</i>        | 3.20                   | <b>0.027*</b>  | 2.62                   | 0.205          |
| Yes vs No                                   | (1.14-8.97)            |                | (0.59-11.59)           |                |
| Weight loss                                 | 5.43                   | <b>0.033*</b>  | 2.87                   | 0.210          |
| Yes vs No                                   | (1.15-25.65)           |                | (0.55-14.90)           |                |
| <i>Pale mucous membrane</i>                 | 0.48                   | 0.242          | 0.62                   | 0.679          |
| Yes vs No                                   | (0.14-1.65)            |                | (0.06-6.06)            |                |
| <i>Conjunctivitis/Ocular manifestations</i> | 4.86                   | 0.154          | Na                     | 0.992          |
| Yes vs No                                   | (0.55-42.54)           |                |                        |                |

Statistical analysis to evaluate the presence of clinical signs in relation to the different infections detected in the examined dogs.

## Geographic distribution of parasites

Santorini showed the highest prevalence of infected dogs (65.2%) and the highest value of infection by Ancylostomatidae (27.3%) (Fisher's exact test,  $p < 0.001$ ), while Skiathos had the highest rate of dogs that seroreacted to *R. conorii* (73.2%) (Fisher's exact test,  $p < 0.001$ ) and of dogs infected by *D. immitis* (2.4%) and *D. repens* (7.3%) (Fisher's exact test,  $p = 0.008$ ). Skiathos showed the highest percentage of positivity to *L. infantum* (17.1%).

## Zoonotic risk

The risk to carry zoonotic pathogens (i.e. *R. conorii*, *Anaplasma* spp., *L. infantum*, *Dirofilaria* spp., Ancylostomatidae and *T. canis*) was associated to animal age, as dogs ageing 1-7 years increased the odds of infections by 3.85-fold (i.e. 1/0.26) in comparison to younger animals. Furthermore, the sex and lifestyle were also found statistically related with zoonotic infections with male and stray dogs being 2.13 and 3 times more likely affected than female and owned dogs, respectively.

## Discussion

In the present study 65% of the dogs showed exposure to or were carrying pathogens, and 64% harboured a pathogen with a zoonotic potential. Among them, canine geohelminths have an important

309 health impact for both animals and humans. Thus, dogs here found infected by *T. canis* or hookworms  
 310 represent a potential health risk especially because free roaming animals are a source of  
 311 environmental contamination [25]. Human infection by *T. canis* may lead either to subclinical  
 312 infections or to different *larva migrans* syndromes i.e. visceral, ocular and neural, that may have  
 313 serious clinical manifestations [26, 27]. *Ancylostoma caninum* larvae may penetrate the human skin  
 314 and cause follicular, papular/pustule and ephemeral lesions, muscular damages and, seldom,  
 315 eosinophilic enteritis. The risk of human infection is enhanced by walking barefoot or lying on grass  
 316 and soil in contaminated areas [27].

317 Eggs of the tapeworm *H. diminuta* were found in one dog. Although the main hosts of this parasite are  
 318 rodents [28, 29], in rare cases dogs and other mammals, including humans, may also be infected.  
 319 Similarly, eggs of *D. dentriticum* a trematode commonly found in the liver of ruminants, were found  
 320 in one dog. While in some cases this parasite can infect other mammals, including dogs and humans  
 321 [30, 31], it is plausible that pseudoparasitism is the cause of this finding [32].

322 The high rate of exposure of the here studied dogs to several pathogens transmitted by arthropods, is  
 323 of importance because some VBDs are shared between companion animals and people. Moreover, to  
 324 the best of the authors' knowledge, this is the first report of seroprevalence and molecular detection  
 325 of *Babesia* spp., *E. canis*, *R. conorii* and *Anaplasma* spp. in dogs from the herein study areas.

326 The high seroprevalence for *R. conorii*, i.e. the main aetiological agent of the Mediterranean spotted  
 327 fever in Europe [33], suggests a frequent exposure and/or persistent low-grade infections. This is not  
 328 surprising if one considers the geographical location of the study sites, i.e. regions in Southern Europe  
 329 with favorable environments for ticks and local circulation of transmitted pathogens. It is worth noting  
 330 that the DNA of this bacterium was found in 11% of examined dogs, thus further corroborating recent  
 331 findings that have indicate dogs as important reservoirs of this pathogen and source of infection for  
 332 ticks [34-36]. The role of dogs as reservoirs is further supported by the absence of clinical signs or  
 333 by the presence of mild aspecific alterations, as in the present study (e.g. lymphadenopathy). Under

334 an epizootiological standpoint it is remarkable that all ticks collected from positive animals were *R.*  
335 *sanguineus*, i.e. the main vector of *R. conorii* [33]. It is also interesting that a past survey carried out  
336 in the island of Crete showed a human seroprevalence rate of 7.6% for *R. conorii* [37]. Although no  
337 ticks from Crete were PCR-positive for *R. conorii* [37], the bacterium was isolated from *R.*  
338 *sanguineus* and humans in other areas of Greece with high seroprevalence in people [38, 39]. More  
339 importantly, several cases of human Mediterranean spotted fever have been reported in Greece [40,  
340 41].

341 *Ehrlichia canis* causes the canine monocytic ehrlichiosis, a severe and potentially life-threatening  
342 illness in dogs transmitted in Europe by *R. sanguineus* [42-44]. Although an *E. canis*-like organism  
343 has been described in humans in Venezuela [45], to date this VBD is not considered zoonotic. The  
344 infection rate by *E. canis*, much lower than that recorded for *R. conorii*, could appear unexpected, but  
345 it is similar with that recorded in a recent study from southern Italy [46]. It should be noted that  
346 different lineages of *R. sanguineus* have a low capacity to transmit *E. canis* [47], thus explaining why  
347 in some cases the prevalence of *E. canis* infection could result lower than expected [48, 49].

348 It could be hypothesized that some *R. sanguineus* lineages may have opposite ability to transmit  
349 either *R. conorii* or *Ehrlichia/Anaplasma*. Further studies to investigate this issue are thus warranted.

350 *Anaplasma phagocytophilum* was detected in one dog. It is an emerging vector-borne pathogen  
351 transmitted by *Ixodes ricinus* ticks [50]. This tick species was not found on the dogs examined in the  
352 present study. However, it is widespread in continental Greece [49, 51, 52] and further investigations  
353 to evaluate its presence in insular Greece could be thus useful. The absence or limited occurrence of  
354 *A. platys*, the agent of infectious cyclic thrombocytopenia, is more surprising as this bacterium is  
355 probably transmitted by *R. sanguineus* ticks and common in the Mediterranean regions [43, 53].  
356 Again, this epidemiological feature could be due to the presence of different lineages of the brown  
357 dog tick.



358 Although the most common canine haemoprotozoan in Mediterranean countries is *Babesia vogeli*, *B.*  
359 *canis* is also enzootic in Europe [3], including in countries neighbouring to Greece and the Balkan  
360 Peninsula [54, 55]. The presence of *B. canis* in insular regions of Greece is an unexpected result  
361 because its primary vector, *Dermacentor reticulatus*, generally lives in cool and wet climates. As *D.*  
362 *reticulatus* can also be found in warm and temperate areas [56], its sporadic presence in Greece,  
363 especially in continental regions, needs to be taken into account. The owner of the dog declared that  
364 the dog had travelled in continental Greece but further details were not provided. Thus, the origin of  
365 this result could be likely due to an infection acquired in other areas of the Country, although further  
366 information was not available.

367 The presence of several *L. infantum*-positive dogs in all study sites is explained by its wide  
368 distribution in Southern Europe [57], including Greece where mean seropositivity is around 20% [5,  
369 6]. This high infection pressure is shown also by the recent records of infection in cats from Crete  
370 and Athens [9] and by the more than 300 autochthonous human cases reported in 2005-2010  
371 according the Hellenic Center for Disease Control and Prevention [6]. The zoonotic potential of *L.*  
372 *infantum* in humans is of great importance, as the disease may be severe and presents with visceral,  
373 cutaneous and mucocutaneous signs [58].

374 Dogs living in Skiathos proved to be at risk of dirofilariosis. Though *Dirofilaria* spp. have been here  
375 diagnosed with a low prevalence, their ability in causing disease in humans should be taken into  
376 account. The number of human cases of *D. repens* infection in Europe is currently a public health  
377 concern and the lack of awareness with diagnosis and control in microfilariaemic dogs could lead to  
378 lack of vigilance and underestimation for this parasite [59]. *Dirofilaria* infections were here found  
379 only in Skiathos (where endemic infections by *D. immitis* is absent) in a single dog that was imported  
380 from an area of Central Greece where the prevalence of canine dirofilariosis is about 7% [60]. This  
381 confirms that undiagnosed and untreated microfilariaemic dogs are an important source of infection  
382 for mosquitoes and may also introduce these pathogens in other regions.

383 The association of the study sites with given infections may be due to the different island  
384 characteristics. Skiathos, where dogs resulted more likely infected with VBDs and ectoparasites than  
385 in other sites, is a part of the Vories Sporades, an island formation with a rich vegetation that fosters  
386 the maintenance of ectoparasites and vectors more efficiently. Indeed, the dry environment of  
387 Santorini, Ios and Tinos, belonging to different island formations (i.e. Cyclades) is characterized by  
388 poor vegetation.

389 The higher occurrence of intestinal parasites in Santorini rather in the other islands is difficult to  
390 explain. These results could have originated by chance but it could be hypothesized that differences  
391 in regular epizootiological vigilance and appropriate veterinary care in terms of prevention, diagnosis  
392 and treatment have a certain role, although further investigations are warranted to clarify these issues.  
393 The higher occurrence of intestinal nematodes in dogs ageing 1-7 years should be interpreted with  
394 caution given the lack of precise information provided in some cases by the owners about anthelmintic  
395 treatments. Owners could be less willing to engage in preventative or therapeutic practices for dogs  
396 ageing more than 1 year because erroneously considered at less risk of intestinal parasitoses. These  
397 data further indicate that a high level of vigilance comprising a routine fecal examinations and  
398 appropriate anthelmintic treatments are still indicated in adult dogs and should be encouraged among  
399 owners.

400 In conclusion, it is here shown that regular investigations should be encouraged in areas where data  
401 on parasite occurrence is still limited, and that prompt diagnosis and infection control are a priority.  
402 This is especially relevant for Mediterranean countries where epizootiological and biological  
403 conditions favour the occurrence and circulation of several parasitoses and VBDs in animal  
404 populations due to good and animal trade, dog adoptions and holiday trips of people [36, 43, 61-63].  
405 As visitors and tourists often bring their pets during holidays, introduction of parasites from endemic  
406 to free areas can occur. At the same time there is the risk that these dogs acquire pathogens in a new,  
407 enzootic environment and introduce them in free areas when they go home. In this view, timely use  
408 of dewormers (e.g. macrocyclic lactones) secures treatment of zoonotic geohelminthoses and at the

same time provide efficacious prevention for spreading (e.g. *D. immitis*) or largely distributed (e.g. roundworms) parasites. Also, the appropriate use of acaricides, insecticides and repellents are reliable ways to improve dog health and to control environmental infection by vectors, preventing the spread of potentially deadly diseases.

## Acknowledgements

The authors thank Carmine Merola and Raffaella Iorio for the participation in this study. Special acknowledgments are due to the veterinarians in the Islands of the study: Maria Danezi, Kalliopi Tsagari and Manina Vlastaridou as well as to the Greek Action of Volunteer Veterinarians (GAVV) for their valuable help and excellent collaboration.

## References

1. Deplazes P, van Knapen F, Schweiger A, Overgaaauw PA. Role of pet dogs and cats in the transmission of helminthic zoonoses in Europe, with a focus on echinococcosis and toxocarosis. *Vet Parasitol.* 2011;182(1): 41-53.
2. Baneth G, Thamsborg SM, Otranto D, Guillot J, Blaga R, Deplazes P, Solano-Gallego L. Major parasitic zoonoses associated with dogs and cats in Europe. *J Comp Pathol.* 2016;155(1 Suppl 1): S54-74.
3. Solano-Gallego L, Sainz Á, Roura X, Estrada-Peña A, Miró G. A review of canine babesiosis: the European perspective. *Parasit Vectors.* 2016;9(1): 336.
4. Tennant KV, Barker EN, Polizopoulou Z, Helps CR, Tasker S. Real-time quantitative polymerase chain reaction detection of haemoplasmas in healthy and unhealthy dogs from Central Macedonia, Greece. *J Small Anim Pract.* 2011;52(12): 645-649.
5. Athanasiou LV, Kontos VI, Saridomichelakis MN, Rallis TS, Diakou A. A cross-sectional sero-epidemiological study of canine leishmaniasis in Greek mainland. *Acta Trop.* 2012;122(3): 291-295.
6. Ntais P, Sifaki-Pistola D, Christodoulou V, Messaritakis I, Pratlong F, Poupalos G, Antoniou M. Leishmaniasis in Greece. *Am J Trop Med Hyg.* 2013;89(5): 906-915.
7. Kostopoulou D, Claerebout E, Arvanitis D, Ligda P, Voutzourakis N, Casaert S, Sotiraki S. Abundance, zoonotic potential and risk factors of intestinal parasitism amongst dog and cat populations: The scenario of crete, Greece. *Parasit Vectors.* 2017;10(1): 43-55.
8. Chatzidakis A. Development analysis of tourist movement. Greek Tourism Organisation, The National Printing House. Athens, Greece; 2011.
9. Diakou A, Di Cesare A, Accettura PM, Barros L, Iorio R, Paoletti B, Frangipane di Regalbano A, Halos L, Beugnet F, Traversa D. Intestinal parasites and vector-borne pathogens in stray and free-roaming cats living in continental and insular Greece. *PLoS Negl Trop Dis.* 2017;11(1): e0005335.
10. MAFF Ministry of Agriculture, Fisheries and Food. Manual of Veterinary Parasitological Laboratory Techniques; 1986. p. 160.
11. Taylor MA, Coop RL, Wall RL. *Veterinary Parasitology.* 3rd ed. Blackwell, Oxford; 2007.

12. Sloss MW, Kemp RL, Zajac AM. Veterinary Clinical Parasitology. 6th ed. Iowa State University Press, USA; 1994.
13. Harvey JW, Simpson CF, Gaskin JM. Cyclic thrombocytopenia induced by a *Rickettsia*-like agent in dogs. J Infect Dis. 1978;137(2): 182-188.
14. Lindsey JR. Identification of canine microfilariae. J Am Vet Med Assoc. 1965;146: 1106-1114.
15. Euzeby J. Diagnostic experimental des helminthoses animales. Travaux pratiques d'helminthologie veterinaire, Livre 1. Paris, France: Informations Techniques des Services Veterinaires, Ministry of Agriculture; 1981. p. 302.
16. Maia C, Ramos C, Coimbra M, Bastos F, Martins A, Pinto P, Nunes M, Vieira ML, Cardoso L, Campino L. Bacterial and protozoal agents of feline vector-borne diseases in domestic and stray cats from southern Portugal. Parasit Vectors. 2014a;7: 115-123.
17. Maia C, Ferreira A, Nunes M, Vieira ML, Campino L, Cardoso L. Molecular detection of bacterial and parasitic pathogens in hard ticks from Portugal. Ticks Tick Borne Dis. 2014b;5(4): 409-414.
18. Altschul SF, Madden TL, Schäffer AA, Zhang J, Zhang Z, Miller W, Lipman DJ. Gapped BLAST and PSI-BLAST: a new generation of protein database search programs. Nucleic Acids Res. 1997;25(17): 3389-3402.
19. Manilla G, Iori A. Illustrated key to the ticks of Italy. I. Larval stages of the species of the Ixodinae subfamily (Acari, Ixodoidea, Ixodidae). Parassitologia. 1992. 34(1-3): 83-95.
20. Linardi PM, Santos JL. *Ctenocephalides felis felis* vs. *Ctenocephalides canis* (Siphonaptera: Pulicidae): some issues in correctly identify these species. Rev Bras Parasitol Vet. 2012;21(4): 345-354.
21. Varma MGR. Ticks and mites, in Medical Insects and Arachnids. In: Lane RP, Crossey RW editors. Chapter 18. Chapman and Hall, London; 1993.
22. Vittinghoff E, Glidden DV, Shiboski SC, McCulloch CE. Regression methods in biostatistics: Linear, logistic, survival and repeated measures models. 2nd ed. Springer, New York; 2012. p. 512.
23. Zar JH. Biostatistical analysis. 4th ed. New Jersey: Prentice-Hall; 1998.
24. McCullagh P, Nelder JA. Generalized Linear Models. 2nd ed. Chapman and Hall, London; 1989.
25. Traversa D. Pet roundworms and hookworms: a continuing need for global worming. Parasit Vectors. 2012;5: 91.
26. Despommier D. Toxocariasis: clinical aspects, epidemiology, medical ecology, and molecular aspects. Clin Microbiol Rev. 2003;16(2): 265-272.
27. Lee AC, Schantz PM, Kazacos KR, Montgomery SP, Bowman DD. Epidemiologic and zoonotic aspects of ascarid infections in dogs and cats. Trends Parasitol. 2010;26(4): 155-161.
28. Guardone L, Macchioni F, Torracca B, Gabrielli S, Magi M. *Hymenolepis diminuta* (rat tapeworm) infection in a dog in Liguria, northwest Italy. Parassitologia. 2010;52: 244.
29. Gupta P, Gupta P, Bhakri BK, Kaistha N, Omar BJ. *Hymenolepis diminuta* infection in a school going child: first case report from Uttarakhand. J Clin Diagn Res. 2016;10(9): 4-5.
30. Cabeza-Barrera I, Cabezas-Fernández T, Salas Coronas J, Vázquez Villegas J, Cobo F. *Dicrocoelium dendriticum*: an emerging spurious infection in a geographic area with a high level of immigration. Ann Trop Med Parasitol. 2011;105(5): 403-406.
31. Azmoudeh-Ardalan F, Soleimani V, Jahanbin B. *Dicrocoelium dendriticum* in explanted liver: report of an unusual finding. Exp Clin Transplant. 2017;15(Suppl 1): 178-181.
32. Jayathilakan K, Sultana K, Radhakrishna K, Bawa AS. Utilization of byproducts and waste materials from meat, poultry and fish processing industries: a review. J Food Sci Technol. 2012;49(3): 278-293.
33. Portillo A, Santibáñez S, García-Álvarez L, Palomar AM, Oteo JA. Rickettsioses in Europe. Microbes Infect. 2015;17(11-12): 834-838.

34. Levin ML, Killmaster LF, Zemtsova GE. Domestic dogs (*Canis familiaris*) as reservoir hosts for *Rickettsia conorii*. Vector Borne Zoonotic Dis. 2012;12(1): 28-33.
35. Levin ML, Zemtsova GE, Montgomery M, Killmaster LF. Effects of homologous and heterologous immunization on the reservoir competence of domestic dogs for *Rickettsia conorii* (*israelensis*). Ticks Tick Borne Dis. 2014;5(1): 33-40.
36. Traversa D, Di Cesare A, Simonato G, Cassini R, Merola C, Diakou A, Halos L, Beugnet F, Frangipane di Regalbono A. Zoonotic intestinal parasites and vector-borne pathogens in Italian shelter and kennel dogs. Comp Immunol Microbiol Infect Dis. 2017;51: 69-75.
37. Antoniou M, Economou I, Wang X, Psaroulaki A, Spyridaki I, Papadopoulos B, Christidou A, Tsafantakis E, Tselentis Y. Fourteen-year seroepidemiological study of zoonoses in a Greek village. Am J Trop Med Hyg. 2002;66(1): 80-85.
38. Psaroulaki A, Spyridaki I, Ioannidis A, Babalis T, Gikas A, Tselentis Y. First isolation and identification of *Rickettsia conorii* from ticks collected in the region of Fokida in Central Greece. J Clin Microbiol. 2003;41(7): 3317-3319.
39. Psaroulaki A, Germanakis A, Gikas A, Scoulica E, Tselentis Y. First isolation and genotypic identification of *Rickettsia conorii* Malish 7 from a patient in Greece. Eur J Clin Microbiol Infect Dis. 2005;24(4): 297-298.
40. Germanakis A, Psaroulaki A, Gikas A, Tselentis Y. Mediterranean spotted fever in crete, Greece: clinical and therapeutic data of 15 consecutive patients. Ann N Y Acad Sci. 2006;1078: 263-269.
41. Papa A, Dalla V, Petala A, Maltezou HC, Maltezos E. Fatal Mediterranean spotted fever in Greece. Clin Microbiol Infect. 2010. 16(6): 589-592.
42. Little SE. Ehrlichiosis and anaplasmosis in dogs and cats. Vet Clin North Am Small Anim Pract. 2010;40(6): 1121-1140.
43. René-Martellet M, Lebert I, Chêne J, Massot R, Leon M, Leal A, Badavelli S, Chalvet-Monfray K, Ducrot C, Abrial D, Chabanne L, Halo L. Diagnosis and incidence risk of clinical canine monocytic ehrlichiosis under field conditions in Southern Europe. Parasit Vectors. 2015;8: 3-12.
44. Parashar R, Sudan V, Jaiswal AK, Srivastava A, Shanker D. Evaluation of clinical, biochemical and haematological markers in natural infection of canine monocytic ehrlichiosis. J Parasit Dis. 2016;40(4): 1351-1354.
45. Fishbein DB, Dawson JE, Robinson LE. Human ehrlichiosis in the United States, 1985 to 1990. Ann Intern Med. 1994;120(9): 736-743.
46. Piantedosi D, Neola B, D'Alessio N, Di Prisco F, Santoro M, Pacifico L, Sgroi G, Auletta L, Buch J, Chandrashekar R, Breitschwerdt EB, Veneziano V. Seroprevalence and risk factors associated with *Ehrlichia canis*, *Anaplasma* spp., *Borrelia burgdorferi* sensu lato, and *D. immitis* in hunting dogs from southern Italy. Parasitol Res. 2017;116(10): 2651-2660.
47. Moraes-Filho J, Krawczak FS, Costa FB, Soares JF, Labruna MB. Comparative evaluation of the vector competence of four South American populations of the *Rhipicephalus sanguineus* group for the bacterium *Ehrlichia canis*, the agent of canine monocytic ehrlichiosis. PLoS One. 2015;10(9): e0139386.
48. Estrada-Peña A, Roura X, Sainz A, Miró G, Solano-Gallego L. Species of ticks and carried pathogens in owned dogs in Spain: results of a one-year national survey. Ticks Tick Borne Dis. 2017;8(4): 443-452.
49. Latrofa MS, Angelou A, Giannelli A, Annoscia G, Ravagnan S, Dantas-Torres F, Capelli G, Halos L, Beugnet F, Papadopoulos E, Otranto D. Ticks and associated pathogens in dogs from Greece. Parasit Vectors. 2017;10(1): 301-307.
50. Kachrimanidou M, Papa A, Chochlakis D, Pavlidou V, Psaroulaki A. Molecular evidence for *Anaplasma phagocytophilum* in *Ixodes ricinus* ticks from Greece. Vector Borne Zoonotic Dis. 2011;11(10): 1391-1393.



51. Papadopoulos B, Morel PC, Aeschlimann A. Ticks of domestic animals in the Macedonia region of Greece. *Vet Parasitol.* 1996;63(1-2): 25-40.
52. Pavlidou V, Gerou S, Kahrimanidou M, Papa A. Ticks infesting domestic animals in northern Greece. *Exp Appl Acarol.* 2008;45(3-4): 195-198.
53. Sainz Á, Roura X, Miró G, Estrada-Peña A, Kohn B, Harrus S, Solano-Gallego L. Guideline for veterinary practitioners on canine ehrlichiosis and anaplasmosis in Europe. *Parasit Vectors.* 2015;8: 75-95.
54. Hamel D, Silaghi C, Knaus M, Visser M, Kusi I, Rapti D, Rehbein S, Pfister K. Detection of *Babesia canis* subspecies and other arthropod-borne diseases in dogs from Tirana, Albania. *Wien Klin Wochenschr.* 2009;121 Suppl 3: 42-45.
55. Davitkov D, Vucicevic M, Stevanovic J, Krstic V, Tomanovic S, Glavinic U, Stanimirovic Z. Clinical babesiosis and molecular identification of *Babesia canis* and *Babesia gibsoni* infections in dogs from Serbia. *Acta Vet Hung.* 2015;63(2): 199-208.
56. Rubel F, Brugger K, Pfeffer M, Chitimia-Dobler L, Didyk YM, Leverenz S, Dautel H, Kahl O. Geographical distribution of *Dermacentor marginatus* and *Dermacentor reticulatus* in Europe. *Ticks Tick Borne Dis.* 2016;7(1): 224-233.
57. Gramiccia M, Gradoni L. The current status of zoonotic leishmaniasis and approaches to disease control. *Int J Parasitol.* 2015;35 (11-12): 1169-1180.
58. Strazzulla A, Cocuzza S, Pinzone MR, Postorino MC, Cosentino S, Serra A, Cacopardo B, Nunnari G. Mucosal leishmaniasis: an underestimated presentation of a neglected disease. *Biomed Res Int.* 2013;2013: 805108.
59. Genchi C, Kramer L. Subcutaneous dirofilariosis (*Dirofilaria repens*): an infection spreading throughout the old world. *Parasit Vectors.* 2017;10(Suppl 2): 517.
60. Diakou A, Kapantaidakis E, Tamvakis A, Giannakis V, Strus N. *Dirofilaria* infections in dogs in different areas of Greece. *Parasit Vectors.* 2016;9(1): 508-514.
61. Miró G, Montoya A, Roura X, Gálvez R, Sainz A. Seropositivity rates for agents of canine vector-borne diseases in Spain: a multicentre study. *Parasit Vectors.* 2013;6: 117.
62. Alho AM, Pita J, Amaro A, Amaro F, Schnyder M, Grimm F, Custódio AC, Cardoso L, Deplazes P, de Carvalho LM. Seroprevalence of vector-borne pathogens and molecular detection of *Borrelia afzelii* in military dogs from Portugal. *Parasit Vectors.* 2016;9(1): 225.
63. Vascellari M, Ravagnan S, Carminato A, Cazzin S, Carli E, Da Rold G, Lucchese L, Natale A, Otranto D, Capelli G. Exposure to vector-borne pathogens in candidate blood donor and free-roaming dogs of northeast Italy. *Parasit Vectors.* 2016;9(1): 369.
